# Supplementary material for: Connections Between ETV6-Modulated Genes: Identification of Shared Features
Source: PubMed Central journal article supplement (PMC2623305; doi:10.4137/cin.s556), 2008-04-21
Supplement: cin-6-0183-s2.pdf [file cin-6-0183-s2.pdf]

## Supplementary table

**Table 1S - Summary of significant associations found between expression profile and GO term trees.**

| Hier. Clust. Pearson 0H-48H                                                                                                                                                                                  |                                                                                                                                                                                                                                                                                                                                                                                                                                                                                                                                                                                                           | Hier. Clust. Euclid. 0H-48H                                                                                                           |                                                                                                                                            | Hier. Clust. Euclid. 0H-4H                              |                                                                                     |
|--------------------------------------------------------------------------------------------------------------------------------------------------------------------------------------------------------------|-----------------------------------------------------------------------------------------------------------------------------------------------------------------------------------------------------------------------------------------------------------------------------------------------------------------------------------------------------------------------------------------------------------------------------------------------------------------------------------------------------------------------------------------------------------------------------------------------------------|---------------------------------------------------------------------------------------------------------------------------------------|--------------------------------------------------------------------------------------------------------------------------------------------|---------------------------------------------------------|-------------------------------------------------------------------------------------|
| All GO terms                                                                                                                                                                                                 |                                                                                                                                                                                                                                                                                                                                                                                                                                                                                                                                                                                                           |                                                                                                                                       |                                                                                                                                            |                                                         |                                                                                     |
| Genes                                                                                                                                                                                                        | Associated terms                                                                                                                                                                                                                                                                                                                                                                                                                                                                                                                                                                                          | Genes                                                                                                                                 | Associated terms                                                                                                                           | Genes                                                   | Associated terms                                                                    |
| p= 0.0046*<br>CIRBP<br>FOXD1<br>GABPB2<br>KLF4<br>PHLDA1<br>PTGS2<br>SOX4                                                                                                                                    | -transcription factor activity<br>-regulation of transcription<br>DNA-dependent<br>-nucleus                                                                                                                                                                                                                                                                                                                                                                                                                                                                                                               | p= 0.032*<br>ABCC3<br>ANXA4<br>CAMKK2<br>G6PC<br>GPR147<br>KCNAB2<br>LIM2<br>MGC4809<br>MYL9<br>PKD2L1<br>SEC14L1<br>SLC7A4<br>TMEFF1 | -ATP bonding<br>-intracellular<br>-golgi apparatus<br>-calcium ion binding<br>-integral to membrane<br>-transport<br>-transporter activity | p= 0.016 <sup>§</sup><br>AKR1C1<br>HMGCS1<br>OASL       | -transferase activity<br>-cytoplasm                                                 |
| p= 0.028*<br>ABCC3<br>AKR1C1<br>AKR1C3<br>ANXA4<br>CAMKK2<br>CROT<br>DHCR7<br>FDFT1<br>G6PD<br>HMGCS1<br>HSD17B7<br>IDI1<br>KCNAB2<br>MGC4809<br>MYL9<br>OASL<br>PECR<br>PTGER4<br>SC4MOL<br>SEC14L1<br>SQLE | -immune response<br>-ATP binding<br>-intracellular<br>-transferase activity<br>-calcium ion binding<br>-lipid metabolism<br>-cytoplasm<br>-trans-1,2-dihydrobenzene-1,2-diol dehydrogenase<br>-aldo-keto reductase activity<br>-electron transporter activity<br>-binding<br>-fatty acid metabolism<br>-metabolism<br>-sterol biosynthesis<br>-peroxisome<br>-endoplasmic reticulum<br>-integral to membrane<br>-steroid biosynthesis<br>-oxidoreductase activity<br>-isoprenoid biosynthesis<br>-cholesterol biosynthesis<br>-magnesium ion binding<br>-transport<br>-transporter activity<br>-microsome | p= 0.037*<br>APBA1<br>FLRT3<br>KBTBD4<br>LDLR<br>MSR1<br>NINJ2<br>PTPRF                                                               | -cell adhesion<br>-protein binding<br>-integral to plasma membrane<br>-receptor activity<br>-lipid transporter activity                    | p= 0.037 <sup>§</sup><br>CLIC3<br>PPP2R2B<br>SLC12A3    | -signal transduction<br>-chloride transport<br>-ion transport<br>-membrane fraction |
| GO molecular function terms                                                                                                                                                                                  |                                                                                                                                                                                                                                                                                                                                                                                                                                                                                                                                                                                                           |                                                                                                                                       |                                                                                                                                            |                                                         |                                                                                     |
| p= 0.027*<br>FOXD1<br>GABPB2<br>KLF4<br>PTPRF<br>SOX4                                                                                                                                                        | -protein binding<br>-zinc ion binding<br>-transcription factor activity                                                                                                                                                                                                                                                                                                                                                                                                                                                                                                                                   | p= 0.013*<br>ANXA4<br>LDLR<br>MGC4809<br>MYL9<br>PKD2L1                                                                               | -calcium ion binding<br>-zinc ion binding                                                                                                  | p= 0.025*<br>ANXA4<br>LDLR<br>MGC4809<br>MYL9<br>PKD2L1 | -calcium ion binding                                                                |
| GO biological process terms                                                                                                                                                                                  |                                                                                                                                                                                                                                                                                                                                                                                                                                                                                                                                                                                                           |                                                                                                                                       |                                                                                                                                            |                                                         |                                                                                     |
| p= 0.01*<br>DNAJB1<br>HSPA1B                                                                                                                                                                                 | -response to unfolded proteins<br>-protein folding                                                                                                                                                                                                                                                                                                                                                                                                                                                                                                                                                        | p= 0.045*<br>(0,068)<br>FOXD1<br>SOX4                                                                                                 | -regulation of transcription,<br>DNA-dependent                                                                                             | p=0.045*<br>(0,079)<br>FOXD1<br>SOX4                    | -regulation of transcription,<br>DNA-dependent                                      |
| p=0.032*<br>FOXD1<br>GABPB2<br>SOX4                                                                                                                                                                          | -regulation of transcription,<br>DNA-dependent                                                                                                                                                                                                                                                                                                                                                                                                                                                                                                                                                            | p= 0.0045*<br>AKR1C3<br>FDFT1<br>IDI1                                                                                                 | -isoprenoid biosynthesis<br>-cholesterol biosynthesis                                                                                      | p= 0.003*<br>DHCR7<br>HMGCS1                            | -cholesterol biosynthesis                                                           |
| p=0.031*<br>ABCC3<br>CROT<br>HSD17B7<br>PECR<br>SC4MOL<br>SEC14L1<br>SQLE                                                                                                                                    | -transport<br>-sterol biosynthesis<br>-fatty acid metabolism<br>-metabolism                                                                                                                                                                                                                                                                                                                                                                                                                                                                                                                               | p= 0.017*<br>C11orf8<br>FLRT3<br>NINJ2                                                                                                | -neurogenesis<br>-cell adhesion                                                                                                            | p= 0.013*<br>C3<br>IL18<br>OASL<br>PTGER4               | -immune response<br>-G-protein coupled receptor<br>protein signaling                |
| p= 0.005*<br>AKR1C3<br>DHCR7<br>FDFT1<br>HMGCS1                                                                                                                                                              | -lipid metabolism<br>-isoprenoid biosynthesis<br>-cholesterol biosynthesis                                                                                                                                                                                                                                                                                                                                                                                                                                                                                                                                | p= 0.0093*<br>C3<br>IL18<br>OASL<br>PTGER4                                                                                            | -immune response<br>-G-protein coupled receptor<br>protein signaling                                                                       |                                                         |                                                                                     |

|                                                                                                                                                                                                                                                                                                                                                                                                                                                                                      |                                                                                                                                                                                                                                                                                                                                                                                                                                                                                                                                                                                                                                                                                                                                                                                                                                                                                                                                                                            |                                                                                                                                                                                                                                                                                                                                                                                           |
|--------------------------------------------------------------------------------------------------------------------------------------------------------------------------------------------------------------------------------------------------------------------------------------------------------------------------------------------------------------------------------------------------------------------------------------------------------------------------------------|----------------------------------------------------------------------------------------------------------------------------------------------------------------------------------------------------------------------------------------------------------------------------------------------------------------------------------------------------------------------------------------------------------------------------------------------------------------------------------------------------------------------------------------------------------------------------------------------------------------------------------------------------------------------------------------------------------------------------------------------------------------------------------------------------------------------------------------------------------------------------------------------------------------------------------------------------------------------------|-------------------------------------------------------------------------------------------------------------------------------------------------------------------------------------------------------------------------------------------------------------------------------------------------------------------------------------------------------------------------------------------|
| ID1<br>LDLR                                                                                                                                                                                                                                                                                                                                                                                                                                                                          |                                                                                                                                                                                                                                                                                                                                                                                                                                                                                                                                                                                                                                                                                                                                                                                                                                                                                                                                                                            |                                                                                                                                                                                                                                                                                                                                                                                           |
| <b>GO cell component terms</b>                                                                                                                                                                                                                                                                                                                                                                                                                                                       |                                                                                                                                                                                                                                                                                                                                                                                                                                                                                                                                                                                                                                                                                                                                                                                                                                                                                                                                                                            |                                                                                                                                                                                                                                                                                                                                                                                           |
| p= 0.024*<br>-nucleus<br>CIRBP<br>FOXD1<br>GABPB2<br>KLF4<br>PHLDA1<br>PTGS2<br>PTPRF<br>SOX4                                                                                                                                                                                                                                                                                                                                                                                        | p= 0.035*<br>-integral to plasma membrane<br>-membrane fraction<br>ABCC3<br>DTR<br>FLRT3<br>LDLR<br>NINJ2<br>SLC12A3                                                                                                                                                                                                                                                                                                                                                                                                                                                                                                                                                                                                                                                                                                                                                                                                                                                       | p= 0.0042*<br>-nucleus<br>ABCC3<br>DTR<br>FLRT3<br>LDLR<br>NINJ2<br>SLC12A3                                                                                                                                                                                                                                                                                                               |
| p= 0.0002*<br>-intracellular<br>CAMKK2<br>SEC14L1<br>SMURF                                                                                                                                                                                                                                                                                                                                                                                                                           | p= 0.0087*<br>-endoplasmic reticulum<br>-integral to membrane<br>DHCR7<br>SC4MOL<br>p= 0.014*<br>-cytoplasm<br>AKR1C1<br>HMGCS1<br>OASL<br>p= 0.041*<br>-soluble fraction<br>VEGF<br>CXCL2                                                                                                                                                                                                                                                                                                                                                                                                                                                                                                                                                                                                                                                                                                                                                                                 | p= 0.024*<br>-integral to membrane<br>G6PC<br>GPR147<br>SLC7A4<br>TMEFF1<br>p= 0.017*<br>-cytoplasm<br>HMGCS1<br>OASL<br>P= 0.014*<br>-extracellular<br>C3<br>IL18<br>p= 0.041*<br>-soluble fraction<br>VEGF<br>CXCL2<br>p= 0.03*<br>-intracellular<br>SMURF1<br>CAMKK2                                                                                                                   |
| <b>GO molecular function + biological process terms</b>                                                                                                                                                                                                                                                                                                                                                                                                                              |                                                                                                                                                                                                                                                                                                                                                                                                                                                                                                                                                                                                                                                                                                                                                                                                                                                                                                                                                                            |                                                                                                                                                                                                                                                                                                                                                                                           |
| p= 0.0085*<br>-response to unfolded protein<br>-protein folding<br>DNAJB1<br>HSPA1B<br>p= 0.006*<br>-isoprenoid biosynthesis<br>-cholesterol biosynthesis<br>G6PD<br>-magnesium ion binding<br>HSD17B7<br>-steroid biosynthesis<br>ID1<br>-oxidoreductase activity<br>SC4MOL<br>-metabolism<br>-sterol biosynthesis<br>p= 0.034*<br>-transcription factor activity<br>-regulation of transcription,<br>DNA-dependent<br>FOXD1<br>GABPB2<br>KLF4<br>PTPRF<br>SOX4<br>-protein binding | p= 0.031*<br>-transferase activity<br>CROT<br>HMGCS1<br>OASL<br>p= 0.028*<br>-transport<br>ABCC3<br>-transporter activity<br>G6PC<br>SEC14L1<br>SLC7A4<br>p= 0.0063*<br>-signal transduction<br>CLIC3<br>PPP2R2B<br>SLC12A3<br>p= 0.0063*<br>-isoprenoid biosynthesis<br>-cholesterol biosynthesis<br>-magnesium ion binding<br>FDFT1<br>ID1<br>p= 0.0056*<br>-oxidoreductase activity<br>DHCR7<br>G6PD<br>SC4MOL<br>p= 0.0084*<br>-molecular function unknown<br>-calcium ion binding<br>ANXA4<br>LDLR<br>LPIN1<br>MGC4809<br>MYL9<br>PKD2L1<br>SMURF1<br>p= 0.0084*<br>-zinc ion binding<br>ABPA1<br>-transcription factor activity<br>CRSP2<br>-regulation of transcription,<br>DNA-dependent<br>FLRT3<br>KBTBD4<br>-cell adhesion<br>MSR1<br>-protein binding<br>NINJ2<br>-neurogenesis<br>ZHX2<br>-DNA binding<br>ZNF297B<br>-receptor activity<br>ZNF81<br>p= 0.031*<br>-immune response<br>C3<br>-G-protein coupled receptor<br>protein signaling<br>IL18<br>PTGER4 | p= 0.006*<br>-isoprenoid biosynthesis<br>FDFT1<br>-cholesterol biosynthesis<br>G6PD<br>-magnesium ion binding<br>ID1<br>-oxidoreductase activity<br>SC4MOL<br>p= 0.006*<br>-transcription factor activity<br>-regulation of transcription,<br>DNA-dependent<br>FOXD1<br>SOX4<br>p= 0.013*<br>-immune response<br>C3<br>-G-protein coupled receptor<br>protein signaling<br>IL18<br>PTGER4 |
| <b>GO molecular function + cell component terms</b>                                                                                                                                                                                                                                                                                                                                                                                                                                  |                                                                                                                                                                                                                                                                                                                                                                                                                                                                                                                                                                                                                                                                                                                                                                                                                                                                                                                                                                            |                                                                                                                                                                                                                                                                                                                                                                                           |

|                                                                |                                                                                                                      |                                                                    |                                                                 |                                                                                       |                                                                                                                           |
|----------------------------------------------------------------|----------------------------------------------------------------------------------------------------------------------|--------------------------------------------------------------------|-----------------------------------------------------------------|---------------------------------------------------------------------------------------|---------------------------------------------------------------------------------------------------------------------------|
| p= 0.009*<br>CIRBP<br>FOXD1<br>KLF4<br>PHLDA1<br>PTGS2<br>SOX4 | -nucleus<br>-transcription factor activity                                                                           | p=0.0035*<br>CIRBP<br>PHLDA1                                       | -nucleus                                                        | p= 0.0035*<br>CIRBP<br>PHLDA1                                                         | -nucleus                                                                                                                  |
| p= 0.011*<br>NUDT6<br>PPP3CC                                   | -hydrolase activity                                                                                                  | p= 0.0059*<br>FOXD1<br>SOX4                                        | -nucleus<br>-transcription factor activity                      | p= 0.011*<br>ZNF81<br>ZHX2                                                            | -nucleus<br>-zinc ion binding<br>-transcription factor activity                                                           |
| p= 0.0003*<br>GPR147<br>TMEFF1<br>LIM2<br>SLC7A4               | -integral to membrane                                                                                                | p= 0.022*<br>DTR<br>MSR1                                           | -integral to plasma membrane<br>-receptor activity              | p=0.0059*<br>FOXD1<br>SOX4                                                            | -nucleus<br>-transcription factor activity                                                                                |
| p= 0.027*<br>DHCR7<br>FDFT1<br>HSD17B7<br>SC4MOL               | -endoplasmic reticulum<br>-integral to membrane<br>-oxidoreductase activity                                          | p= 0.0015*<br>GPR147<br>LIM2<br>SLC7A4<br>TMEFF1                   | -integral to membrane                                           | p= 0.022*<br>NUDT6<br>PPP3CC                                                          | -hydrolase activity                                                                                                       |
| p= 0.011*<br>SEC14L1<br>SMURF1                                 | -intracellular                                                                                                       | p= 0.0047*<br>ANXA4<br>CAMKK2<br>LDLR<br>MGC4809<br>MYL9<br>PKD2L1 | -calcium ion binding                                            | p= 0.011*<br>DTR<br>MSR1                                                              | -integral to plasma membrane<br>-receptor activity                                                                        |
|                                                                |                                                                                                                      |                                                                    |                                                                 | p= 0.0028*<br>HMGCS1<br>OASL                                                          | -transferase activity<br>-cytoplasm                                                                                       |
|                                                                |                                                                                                                      |                                                                    |                                                                 | p= 0.011*<br>C3<br>IL18                                                               | -extracellular                                                                                                            |
|                                                                |                                                                                                                      |                                                                    |                                                                 | p= 0.0084*<br>GPR147<br>LIM2<br>SLC7A4<br>TMEFF1                                      | -integral to membrane                                                                                                     |
|                                                                |                                                                                                                      |                                                                    |                                                                 | p= 0.025*<br>ANXA4<br>CAMKK2<br>LDLR<br>MGC4809<br>MYL9<br>PKD2L1                     | -calcium ion binding                                                                                                      |
| <b>GO biological process + cell component terms</b>            |                                                                                                                      |                                                                    |                                                                 |                                                                                       |                                                                                                                           |
| p= 0.0012*<br>CIRBP<br>FOXD1<br>GABPB2<br>PHLDA1<br>SOX4       | -nucleus<br>-regulation of transcription,<br>DNA-dependent                                                           | p= 0.0013*<br>CIRBP<br>PHLDA1                                      | -nucleus                                                        | p= 0.0013*<br>CIRBP<br>PHLDA1                                                         | -nucleus                                                                                                                  |
| p= 0.012*<br>DNAJB1<br>HSPA1B                                  | -response to unfolded protein<br>-protein folding<br>-nucleus                                                        | p= 0.0064*<br>CLIC3<br>SLC12A3                                     | -chloride transport<br>-ion transport<br>-membrane fraction     | p= 0.0051*<br>CLIC3<br>CRSP2<br>FLRT3<br>HSPA1B<br>LPIN1<br>NINJ2<br>SLC12A3<br>TREX1 | -chloride transport<br>-ion transport<br>-membrane fraction<br>-nucleus<br>-cell adhesion<br>-integral to plasma membrane |
| p= 0.024*<br>DHCR7<br>FDFT1<br>HSD17B7<br>SC4MOL               | -metabolism<br>-endoplasmic reticulum<br>-integral to membrane<br>-steroid biosynthesis<br>-cholesterol biosynthesis | p= 0.014*<br>C11orf8<br>FLRT3<br>NINJ2                             | -neurogenesis<br>-cell adhesion<br>-integral to plasma membrane |                                                                                       |                                                                                                                           |
| p= 0.0038*<br>CHST3<br>PKD2L1                                  | -integral to membrane                                                                                                |                                                                    |                                                                 |                                                                                       |                                                                                                                           |
| p= 0.018*<br>GPR147<br>LIM2<br>TMEFF1                          | -integral to membrane                                                                                                |                                                                    |                                                                 |                                                                                       |                                                                                                                           |
| p= 0.0004*<br>CAMKK2<br>SEC14L1<br>SMURF1                      | -intracellular                                                                                                       |                                                                    |                                                                 |                                                                                       |                                                                                                                           |

FDR correction for multiple testing: \*: significant when FDR= 5%; +: significant when FDR= 10%; &: significant when FDR= 15%.
